# Supplementary material for: Porous graphitic carbon nitride with high concentration of oxygen promotes photocatalytic H2 evolution
Source: Royal Society of Chemistry journal article supplement (doi:10.1039/d2ra05662c), 2022-01-01
Supplement: d2ra05662c1.pdf [file d2ra05662c1.pdf]

Electronic Supplementary Material (ESI) for RSC Advances.

## **Porous Graphitic Carbon Nitride with High Concentration of Oxygen Promotes Photocatalytic H<sub>2</sub> Evolution**

Ruokun Jia<sup>a,\*</sup>, Xueli Yu<sup>a</sup>, Xiaohang Yang<sup>b,\*</sup>, Xinzhe Wang<sup>a</sup>, Jiaming Yang<sup>a</sup>, Xuyang Huo<sup>b</sup> and Qiuju Qi<sup>b</sup>

<sup>a</sup> College of Chemical Engineering, Northeast Electric Power University, Jilin 132012, China

<sup>b</sup> Department of Biomedical Engineering, Jilin Medical University, Jilin 132013, China

E-mail: yxh4035@163.com

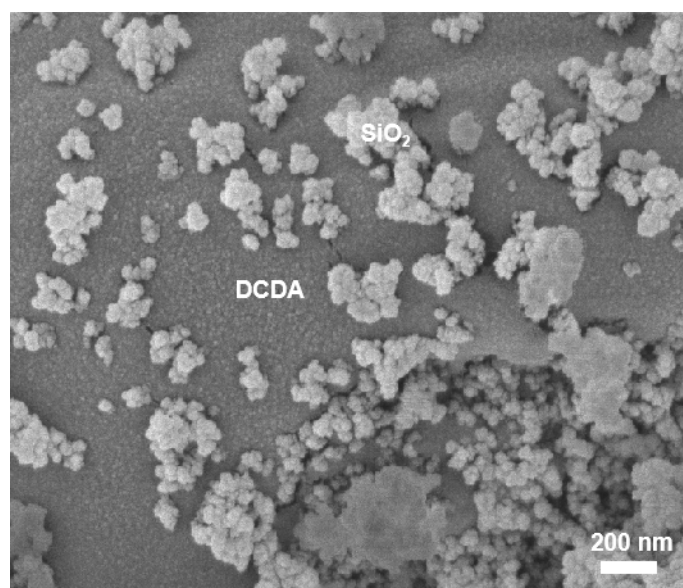

**Fig. S1** SEM image of the SiO<sub>2</sub>/DCDA mixture.

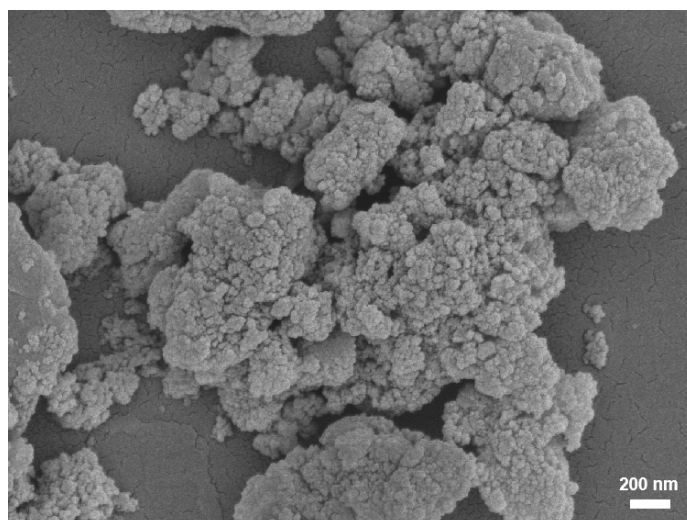

**Fig. S2** SEM image of the SiO<sub>2</sub>/g-C<sub>3</sub>N<sub>4</sub> composite.

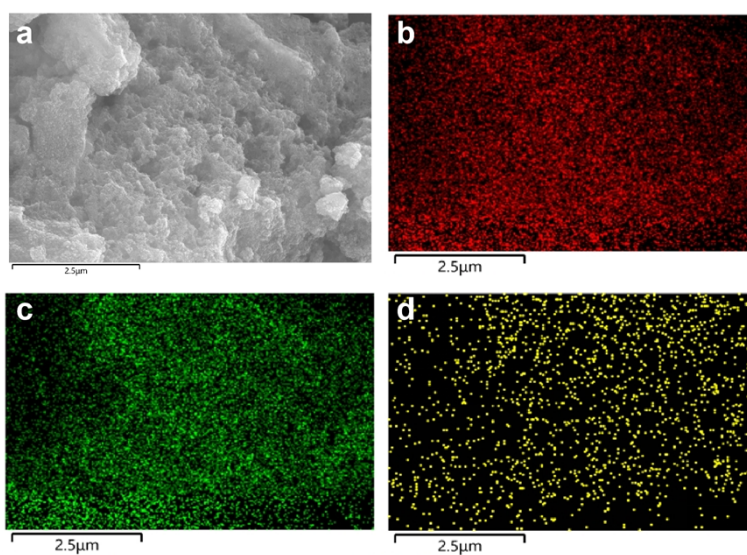

**Fig. S3** (a) SEM image and corresponding (b) C, (c) N and (d) O elemental mapping images of the g-C<sub>3</sub>N<sub>4</sub>-O<sub>8.39</sub> photocatalyst.

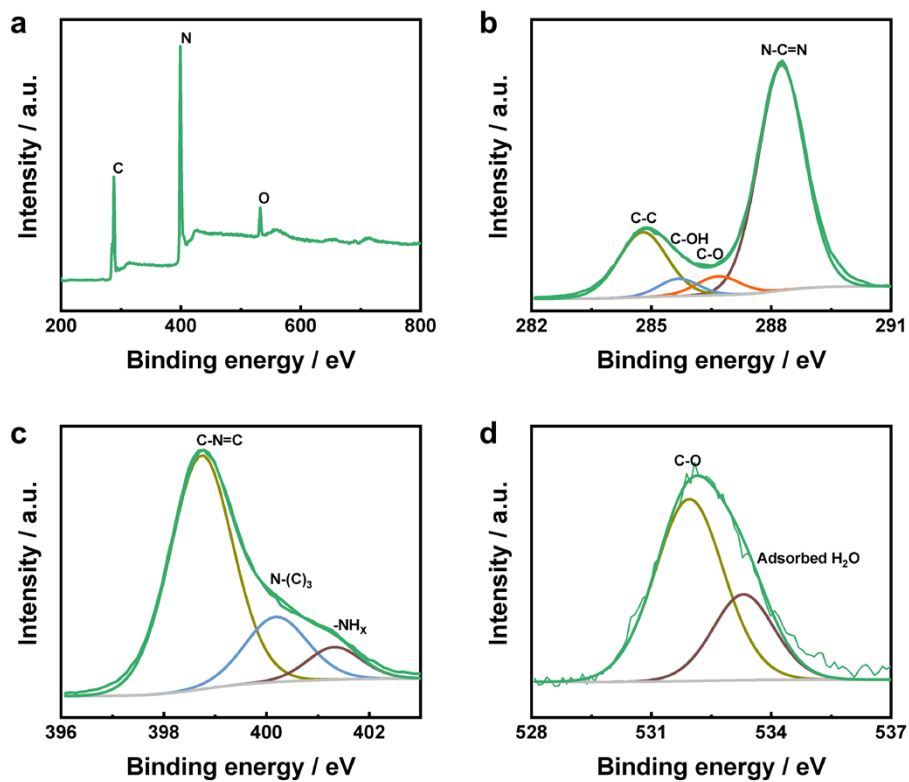

**Fig. S4** (a) Survey XPS spectra, (b) High resolution C 1s XPS spectra, (c) High resolution N 1s XPS spectra and (d) High resolution O 1s XPS spectra of the  $g\text{-C}_3\text{N}_4\text{-O}_{8.39}$  photocatalyst after cyclic photocatalytic  $\text{H}_2$  production reaction.
